# Supplementary material for: Caffeic acid derivative MPMCA suppresses osteoclastogenesis and facilitates osteoclast apoptosis: implications for the treatment of bone loss disorders
Source: publisher site journal article supplement (doi:10.18632/aging.206067), 2024-08-26
Supplement: Supplementary file [file aging-v16i16-206067-supplementary-material-SD1.pdf]

## SUPPLEMENTARY TABLES

**Supplementary Table 1. Primers that were used in this study.**

| Gene   | Forward               | Reverse                 |
|--------|-----------------------|-------------------------|
| GAPDH  | TGTGTCCGTCGTGGATCTGA  | TTGCTGTTGAAGTCGCAGGAG   |
| Acp5   | ATGGGCGCTGACTTCATCAT  | GGTCTCCTGGAACCTCTTGT    |
| CTSK   | AGTAGCCACGCTTCCTATCC  | CCATGGGTAGCAGCAGAAAC    |
| NFATC1 | GACCCGGAGTTCGACTTCG   | TGACACTAGGGGACACATAACTG |
| ALP    | TAGCGGTTACTGTAGACACCC | CACCCTCAAGAGCCTGAGTC    |
| BMP-2  | TGGAAGTGGCCCATTTAGAG  | TGACGCTTTTCTCGTTTGTG    |
| COL1A  | CACCCTCAAGAGCCTGAGTC  | TTAGGCGCAGGAAGGTCAGC    |
| OPN    | GGGACATCGACTGTAGGGACG | ATCTTTCTGCTCACTCTGCT    |

**Supplementary Table 2. Antibodies that were used in this study.**

| Protein | Dilution | Catalog No. | Source                                    |
|---------|----------|-------------|-------------------------------------------|
| p-p38   | 1:3000   | SC-166182   | Santa Cruz Biotechnology, Dallas, TX, USA |
| p38     | 1:3000   | SC-7972     | Santa Cruz Biotechnology, Dallas, TX, USA |
| p-ERK   | 1:3000   | SC-7383     | Santa Cruz Biotechnology, Dallas, TX, USA |
| ERK     | 1:3000   | SC-1647     | Santa Cruz Biotechnology, Dallas, TX, USA |
| p-JNK   | 1:3000   | SC-6254     | Santa Cruz Biotechnology, Dallas, TX, USA |
| JNK     | 1:3000   | SC-7345     | Santa Cruz Biotechnology, Dallas, TX, USA |
| p-p65   | 1:3000   | SC-101752   | Santa Cruz Biotechnology, Dallas, TX, USA |
| p65     | 1:3000   | SC-8008     | Santa Cruz Biotechnology, Dallas, TX, USA |
